# Supplementary material for: The Role of Dectin-2 for Host Defense Against Disseminated Candidiasis
Source: PubMed Central journal article supplement (PMC4827303; doi:10.1089/jir.2015.0040), 2016-04-01
Supplement: Supp_Figure1.pdf [file Supp_Figure1.pdf]

## Supplementary Data

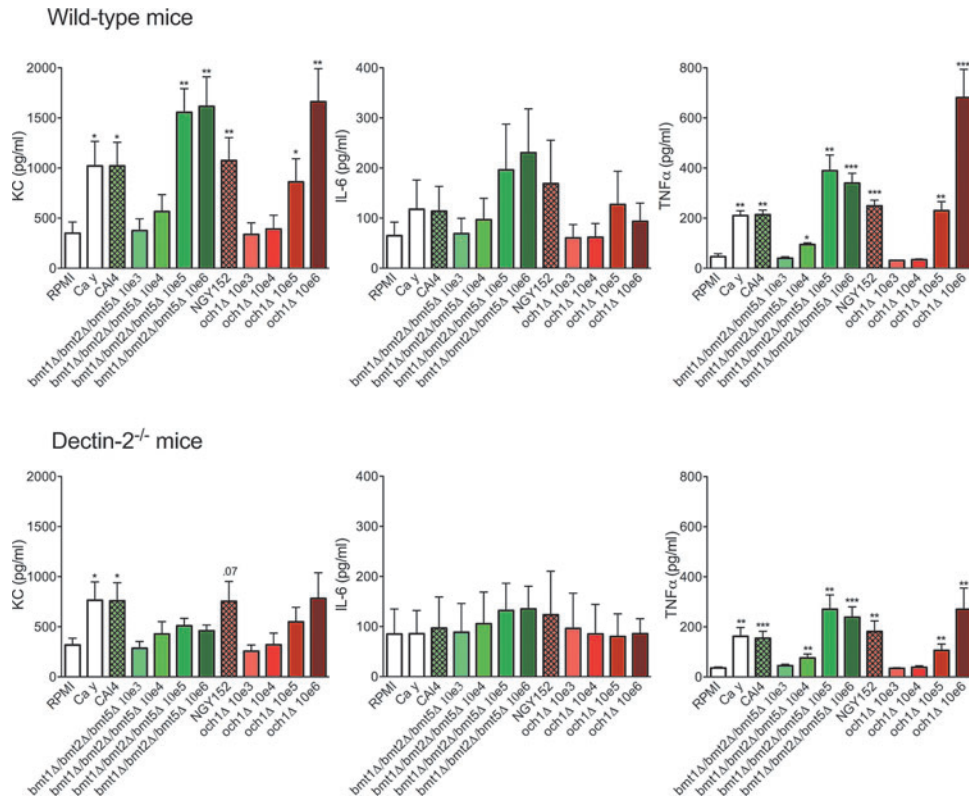

**SUPPLEMENTARY FIG. S1.** Stimulation of cells isolated from wild-type and Dectin-2<sup>-/-</sup> mice with different concentrations of *Candida albicans* mutants. Peritoneal macrophages from naïve wild-type and naïve knockout mice were stimulated with several concentrations of *C. albicans* *bmt1/bmt2/bmt5* and *och1* mutants and their parental strains. Values represent mean  $\pm$  SEM ( $n=8$  mice per group). Significance was determined with Mann-Whitney *U*-test. Statistically different groups are indicated as \* $P<0.05$ ; \*\* $P<0.01$ ; \*\*\* $P<0.001$ . Ca y, *C. albicans* yeast heat-killed.
